# Supplementary material for: The potential role of serum extracellular vesicle derived small RNAs in AML research as non-invasive biomarker
Source: Royal Society of Chemistry journal article supplement (doi:10.1039/d2na00959e), 2023-01-01
Supplement: d2na00959e1.pdf [file d2na00959e1.pdf]

Supplementary Table 136 DESeq2-normalized miRNAs detected in H and AML samples

|             | H        | AML      | Fold change (FC) | Log2FC       |
|-------------|----------|----------|------------------|--------------|
| miR-10a-5p  | 458.8083 | 13568.8  | 29.57401462      | 4.886258195  |
| miR-155-5p  | 69.89218 | 734.3148 | 10.50639422      | 3.393195718  |
| miR-100-5p  | 32.12786 | 284.4989 | 8.855210192      | 3.146526552  |
| miR-181b-5p | 43.96444 | 305.0034 | 6.937501817      | 2.794416244  |
| miR-139-5p  | 243.4953 | 1269.352 | 5.213045177      | 2.382126363  |
| miR-10b-5p  | 643.6844 | 3041.704 | 4.725457784      | 2.240454099  |
| miR-125a-5p | 117.8021 | 493.3878 | 4.188275091      | 2.066356203  |
| let-7b-5p   | 1238.895 | 4935.8   | 3.984033391      | 1.994229739  |
| miR-378a-3p | 46.21902 | 166.5985 | 3.604543371      | 1.849816508  |
| let-7c-5p   | 82.29241 | 281.9359 | 3.426025417      | 1.776535854  |
| miR-181a-5p | 395.6799 | 1307.798 | 3.305191692      | 1.724733947  |
| miR-99a-5p  | 629.5933 | 2078.636 | 3.301554208      | 1.723145334  |
| miR-30a-3p  | 46.21902 | 152.5017 | 3.299543547      | 1.722266459  |
| miR-941     | 55.23737 | 179.4137 | 3.248050071      | 1.699573873  |
| miR-146b-5p | 1030.346 | 3241.622 | 3.146148719      | 1.653586869  |
| miR-222-3p  | 155.0028 | 446.6121 | 2.88131569       | 1.526727737  |
| miR-150-5p  | 108.7838 | 294.7511 | 2.709513271      | 1.438033714  |
| miR-30a-5p  | 199.5309 | 456.8643 | 2.289691794      | 1.195153416  |
| miR-27a-3p  | 851.1064 | 1890.252 | 2.220934899      | 1.151167105  |
| let-7d-3p   | 49.03726 | 107.6482 | 2.195233841      | 1.134374627  |
| miR-197-3p  | 22.54586 | 48.69801 | 2.159953297      | 1.111000118  |
| miR-122-5p  | 1869.616 | 4035.528 | 2.158479581      | 1.110015445  |
| let-7e-5p   | 136.9661 | 292.1881 | 2.133287207      | 1.09307821   |
| let-7a-5p   | 5637.03  | 11428.66 | 2.027424995      | 1.019648542  |
| miR-29a-3p  | 69.89218 | 137.7641 | 1.971094902      | 0.978997239  |
| miR-320b    | 51.29184 | 99.31832 | 1.936337542      | 0.953330465  |
| miR-99b-5p  | 387.2252 | 749.6931 | 1.93606478       | 0.953127225  |
| miR-126-3p  | 20127.26 | 36998.32 | 1.838219516      | 0.87830906   |
| miR-181d-5p | 21.41857 | 39.08656 | 1.82489129       | 0.867810524  |
| miR-342-5p  | 25.3641  | 46.13496 | 1.81890804       | 0.863072605  |
| miR-139-3p  | 31.56421 | 57.02794 | 1.806727852      | 0.853379209  |
| miR-1-3p    | 47.90996 | 84.58076 | 1.765410744      | 0.820003883  |
| miR-361-3p  | 101.4564 | 176.2099 | 1.736804552      | 0.796435412  |
| miR-223-5p  | 321.2786 | 557.4641 | 1.735142538      | 0.795054182  |
| miR-629-5p  | 43.96444 | 69.20244 | 1.574055034      | 0.654485983  |
| miR-30c-5p  | 433.4442 | 676.6461 | 1.561091425      | 0.642555031  |
| miR-335-3p  | 80.03782 | 124.3081 | 1.5531169        | 0.635166423  |
| miR-543     | 73.83771 | 112.1336 | 1.518649365      | 0.60278881   |
| miR-342-3p  | 27.05504 | 39.08656 | 1.444705604      | 0.530775537  |
| miR-92a-3p  | 2735.377 | 3919.549 | 1.432910117      | 0.518948116  |
| miR-532-5p  | 98.63816 | 140.9679 | 1.429142031      | 0.515149302  |
| miR-192-5p  | 132.457  | 187.7437 | 1.417393765      | 0.503240608  |
| miR-148a-3p | 13972.8  | 17839.49 | 1.27673          | 0.35245346   |
| miR-16-2-3p | 117.8021 | 148.0163 | 1.256482527      | 0.329390609  |
| miR-320a-3p | 941.2898 | 1162.345 | 1.234842509      | 0.304327053  |
| miR-25-3p   | 865.7612 | 1031.629 | 1.191586077      | 0.252883172  |
| miR-23a-3p  | 129.0751 | 152.5017 | 1.181495943      | 0.240614675  |
| miR-625-3p  | 80.03782 | 90.9884  | 1.136817525      | 0.1850007    |
| miR-486-3p  | 20.85492 | 23.06748 | 1.106092727      | 0.145472336  |
| miR-140-3p  | 217.5676 | 235.1601 | 1.080860185      | 0.112179915  |
| miR-194-5p  | 23.67316 | 24.34901 | 1.028549189      | 0.040610791  |
| miR-203a-3p | 105.4019 | 108.289  | 1.027391239      | 0.038985676  |
| miR-20a-5p  | 157.2574 | 160.1908 | 1.018653696      | 0.026663673  |
| miR-1301-3p | 29.30962 | 29.47511 | 1.005646272      | 0.008122938  |
| miR-32-5p   | 33.8188  | 33.96046 | 1.004188813      | 0.006030559  |
| miR-24-2-5p | 31.00056 | 30.75664 | 0.992131658      | -0.011396513 |
| miR-7-5p    | 236.7316 | 231.9563 | 0.979828438      | -0.029398931 |
| miR-382-5p  | 47.90996 | 46.77572 | 0.976325639      | -0.034565677 |
| miR-142-5p  | 645.3754 | 627.9481 | 0.972996659      | -0.039493244 |
| miR-19a-3p  | 21.41857 | 20.50443 | 0.957320021      | -0.062926814 |
| miR-3615    | 46.78267 | 44.21267 | 0.945065171      | -0.081514275 |
| miR-340-3p  | 49.6009  | 46.13496 | 0.930123429      | -0.104505917 |
| miR-381-3p  | 151.0573 | 139.0456 | 0.920482846      | -0.119537258 |
| miR-363-3p  | 145.4208 | 133.2788 | 0.916504051      | -0.125786837 |
| miR-3168    | 82.85605 | 74.96931 | 0.904813948      | -0.144306925 |
| miR-22-5p   | 38.32797 | 34.60122 | 0.902766858      | -0.147574639 |
| miR-423-5p  | 2535.846 | 2281.118 | 0.899548875      | -0.152726426 |
| miR-22-3p   | 313.9512 | 277.4505 | 0.88373786       | -0.178309603 |

|                         |          |          |             |              |
|-------------------------|----------|----------|-------------|--------------|
| miR-140-5p              | 37.76432 | 33.31969 | 0.882306139 | -0.180648772 |
| miR-409-3p              | 209.1129 | 181.336  | 0.867168085 | -0.205616434 |
| miR-191-5p              | 1732.65  | 1500.027 | 0.865741648 | -0.207991531 |
| miR-30d-5p              | 3055.528 | 2598.936 | 0.850568508 | -0.233500655 |
| miR-423-3p              | 1189.858 | 1011.765 | 0.85032443  | -0.233914708 |
| miR-183-5p              | 30.43692 | 25.63053 | 0.842087055 | -0.247958707 |
| miR-143-3p              | 564.2103 | 473.5241 | 0.839268882 | -0.252795005 |
| miR-495-3p              | 31.00056 | 25.63053 | 0.826776382 | -0.274430919 |
| let-7f-5p               | 9902.707 | 8147.306 | 0.822735206 | -0.281499916 |
| let-7g-5p               | 3569.01  | 2923.803 | 0.819219578 | -0.287677902 |
| miR-186-5p              | 206.2947 | 168.5208 | 0.816893467 | -0.291780149 |
| miR-224-5p              | 77.78323 | 63.43557 | 0.815543007 | -0.294167137 |
| miR-30e-3p              | 379.8978 | 299.2365 | 0.787676237 | -0.344325342 |
| let-7d-5p               | 640.3026 | 494.0285 | 0.771554852 | -0.37415937  |
| miR-27b-3p              | 810.5238 | 624.1035 | 0.770000187 | -0.377069299 |
| miR-128-3p              | 772.1959 | 592.0653 | 0.766729484 | -0.383210437 |
| miR-28-3p               | 214.1857 | 164.0354 | 0.765856017 | -0.384854908 |
| miR-330-3p              | 29.30962 | 22.42672 | 0.765165642 | -0.386156001 |
| miR-223-3p              | 355.661  | 265.9168 | 0.747669212 | -0.419527969 |
| miR-101-3p              | 915.3621 | 683.0537 | 0.746211503 | -0.422343495 |
| miR-17-5p               | 91.8744  | 66.63939 | 0.725331427 | -0.463287736 |
| miR-126-5p              | 195.0217 | 137.1234 | 0.703118353 | -0.508160541 |
| miR-379-5p              | 135.8388 | 95.47374 | 0.70284569  | -0.508720116 |
| miR-134-5p              | 52.41913 | 36.52351 | 0.696759128 | -0.521268097 |
| miR-15b-5p              | 45.65538 | 31.3974  | 0.687704429 | -0.540139459 |
| miR-28-5p               | 53.54643 | 36.52351 | 0.682090515 | -0.551964894 |
| miR-654-3p              | 44.52808 | 30.11588 | 0.676334477 | -0.564191197 |
| miR-127-3p              | 64.25571 | 42.93114 | 0.668129598 | -0.581800124 |
| miR-26b-5p              | 1087.274 | 718.9365 | 0.661228234 | -0.596779768 |
| miR-493-3p              | 74.965   | 49.33878 | 0.658157514 | -0.603495195 |
| miR-24-3p               | 1299.205 | 851.5745 | 0.655457913 | -0.609424946 |
| miR-411-5p              | 45.09173 | 29.47511 | 0.653670077 | -0.613365439 |
| miR-425-5p              | 293.6599 | 191.5882 | 0.652415432 | -0.616137188 |
| miR-484                 | 72.14677 | 46.77572 | 0.648341245 | -0.625174741 |
| miR-1307-3p             | 327.4787 | 206.9666 | 0.632000104 | -0.662003299 |
| miR-21-5p               | 13918.69 | 8789.351 | 0.631478334 | -0.663194858 |
| miR-30b-5p              | 114.9839 | 72.40626 | 0.629707747 | -0.66724568  |
| miR-221-3p              | 603.6655 | 355.6237 | 0.589107121 | -0.763398104 |
| miR-26a-5p              | 20441.77 | 11699.7  | 0.572342658 | -0.805048956 |
| miR-486-5p              | 1334.152 | 762.5084 | 0.571530568 | -0.807097433 |
| miR-30e-5p              | 459.9356 | 262.0722 | 0.569801921 | -0.811467609 |
| miR-182-5p              | 95.81992 | 54.46488 | 0.568408762 | -0.8149993   |
| miR-432-5p              | 44.52808 | 24.98977 | 0.561213715 | -0.833377829 |
| miR-142-3p              | 361.2975 | 194.1513 | 0.537372402 | -0.896005863 |
| let-7i-5p               | 15391.5  | 8190.878 | 0.532168983 | -0.910043668 |
| miR-328-3p              | 139.7844 | 73.68778 | 0.527153288 | -0.92370556  |
| miR-98-5p               | 353.9701 | 177.4914 | 0.50143066  | -0.995877883 |
| miR-370-3p              | 217.5676 | 107.0075 | 0.491835561 | -1.023752045 |
| miR-374a-5p             | 82.85605 | 40.36809 | 0.487207511 | -1.037391721 |
| miR-106b-3p             | 168.5303 | 79.45465 | 0.471456097 | -1.084804664 |
| miR-146a-5p             | 2130.021 | 958.582  | 0.450034141 | -1.151893644 |
| miR-199a-3p=miR-199b-3p | 1030.346 | 449.8159 | 0.43656778  | -1.195722435 |
| miR-16-5p               | 200.0945 | 86.50305 | 0.43231089  | -1.209858917 |
| miR-93-5p               | 135.8388 | 58.30946 | 0.42925475  | -1.220093996 |
| miR-340-5p              | 371.4431 | 147.3756 | 0.396764842 | -1.333643904 |
| miR-151a-3p             | 10364.9  | 4091.915 | 0.394785835 | -1.34085787  |
| miR-152-3p              | 107.0929 | 41.00885 | 0.382928008 | -1.384854908 |
| miR-339-5p              | 56.92831 | 21.78595 | 0.382691048 | -1.385747942 |
| miR-493-5p              | 100.3291 | 37.80504 | 0.376810303 | -1.408089682 |
| miR-744-5p              | 564.2103 | 208.2481 | 0.369096599 | -1.437929651 |
| miR-11400               | 121.7477 | 42.93114 | 0.352623954 | -1.503797612 |
| miR-451a                | 5646.612 | 1961.377 | 0.347354606 | -1.525518867 |
| miR-103a-3p             | 632.4115 | 207.6073 | 0.328278857 | -1.607006258 |
| miR-584-5p              | 302.6782 | 78.81389 | 0.260388372 | -1.941263073 |
| miR-148b-3p             | 624.5204 | 144.1718 | 0.230851934 | -2.114960275 |
| miR-199a-5p             | 324.0968 | 73.68778 | 0.227363505 | -2.136927395 |
| miR-4433b-3p            | 238.4225 | 53.18336 | 0.223063486 | -2.164473722 |
| miR-185-5p              | 635.7934 | 131.9972 | 0.207610293 | -2.268050125 |
